# Supplementary material
Source: MDPI journal article supplement (https://www.mdpi.com/2312-7481/7/11/147)
Supplement: s1 [file s1]

## Supplementary Materials

### Revisiting the potential functionality of the MagR protein

Alexander Pekarsky<sup>1</sup>, Herwig Michor<sup>2</sup> and Oliver Spadiut<sup>1\*</sup>

<sup>1</sup>Institute of Chemical, Environmental and Bioscience Engineering, Research Area Biochemical Engineering, TU Wien, Wien, Austria

<sup>2</sup>Institute of Solid State Physics, TU Wien, Wiedner Hauptstr., 8-10, A-1040 Wien, Austria

\*Correspondence: Oliver Spadiut, [oliver.spadiut@tuwien.ac.at](mailto:oliver.spadiut@tuwien.ac.at); ORCID: 0000-0003-0916-0644

Alexander Pekarsky: [alexander.pekarsky@tuwien.ac.at](mailto:alexander.pekarsky@tuwien.ac.at); ORCID: 0000-0002-7330-9661

Herwig Michor: [michor@ifp.tuwien.ac.at](mailto:michor@ifp.tuwien.ac.at); ORCID: 0000-0003-1642-5946

Oliver Spadiut: [oliver.spadiut@tuwien.ac.at](mailto:oliver.spadiut@tuwien.ac.at); ORCID: 0000-0003-0916-0644

## 1. Amino acid sequences of target proteins

### MagR from *Columbia livia* (cIMagR)

XP\_005508102.2 reference

MPAAVPGLCGLRRGTSPHMVPAVPGTLVWTPSAVQKIKELLKDKPEHVGKVGVRTRGCNGLSYTLE  
YTKSKGDSDEEVVQDGVRFIEKKAQLTLLGTEMDFVEDKLSSEFVFNNPNIKGTCGCGESFNI

Native amino acid sequence of expressed cIMagR protein

PAAVPGLCGLRRGTSPHMVPAVPGTLVWTPSAVQKIKELLKDKPEHVGKVGVRTRGCNGLSYTLEY  
TKSKGDSDEEVVQDGVRFIEKKAQLTLLGTEMDFVEDKLSSEFVFNNPNIKGTCGCGESFNI

Native amino acid sequence of expressed cIMagR-his protein

PAAVPGLCGLRRGTSPHMVPAVPGTLVWTPSAVQKIKELLKDKPEHVGKVGVRTRGCNGLSYTLEY  
TKSKGDSDEEVVQDGVRFIEKKAQLTLLGTEMDFVEDKLSSEFVFNNPNIKGTCGCGESFNILEHHHH  
HH

### MagR from *Drosophila melanogaster* (dMagR)

NP\_573062.1 reference

MATRVVATATVRAVKGRKLIPTRAALTTPAAVLRIKTLLQDKPDMVGLKVGVRQRGCNGLSYTLDY  
ASQKDKLDEEVVQDGVKVFIDKKAQLSLLGTEMDFVESKLSSEFVFNNPNIKGTCGCGESFSM

Native amino acid sequence of expressed dMagR protein

ATRVVATATVRAVKGRKLIPTRAALTTPAAVLRIKTLLQDKPDMVGLKVGVRQRGCNGLSYTLDYA  
SQKDKLDEEVVQDGVKVFIDKKAQLSLLGTEMDFVESKLSSEFVFNNPNIKGTCGCGESFSM

Native amino acid sequence of expressed dMagR-his protein

ATRVVATATVRAVKGRKLIPTRAALTTPAAVLRIKTLLQDKPDMVGLKVGVRQRGCNGLSYTLDYA  
SQKDKLDEEVVQDGVKVFIDKKAQLSLLGTEMDFVESKLSSEFVFNNPNIKGTCGCGESFSMLEHHHH  
HH

## 2. Plasmid sequences from GenScript with target genes

### pET-21a(+) with dMagR (target with start and stop codon is underlined)

5'-

tggcgaatgggacgcgccctgtagcggcgacgaatgaagcgccgggtgtggtgttacgcgcagcgtgaccgctacacttgccagcgccctagcgcggcgtcctt  
tcgctttctcccttcttctcgcacgttcgccggttccccgtcaagctctaaatcgggggctcccttaggggtccgatttagtgccttacggcacctcgacccca  
aaaaacttgattaggggtgatggttcacgtatgggccatcgccctgatagacgggttttcgccctttgacgttgagtcacgttccttaatagtggactctgttccaaa  
ctggaacaacacacacccatctcgtctattctttgattataagggttttcgccgatttcggcctattggttaaaaaatgagctgatttaacaaaaatttaacgcgaat  
ttaacaaaataataacgtttacaatttcagtggtgcacttttcggggaatgtgcgcggaacccctattgtttattttctaaatacattcaaatatgtatccgctcatgaga  
caataaccctgataaatgctcaataatattgaaaaaggaagagtatgatttcaacatttcgctgcgccttattccctttttgcggcattttgccttctgttttgc  
accagaaacgctggtgaaagtaaaagatgctgaagatcagttgggtgcacgagtggttaccatgaactggaatcacaacagcggaagatccttgagagtttgc  
ccccgaagaacggtttccaatgatgacacttttaagttctgtatgtggcggttattatcccgattgacgccgggcaagagcaactcggcgccgatacacta  
ttctcagaatgacttggtgagctaccagtcacagaaaagcatcttacggatggcatgacagtaagagaattatgcagtgctgccataacctgagtgataacac  
tgccggcaacttacttctgacaacgatcggaggaccgaaggagctaacgctttttgcacaacatgggggatcatgtaactgccttgatcgttgggaaccggag  
ctgaatgaagccatacaaacgacgagcgtgacaccacgatgcctgcagcaatggcaacaacgttcgcgcaactatttaactggcgaaactacttactctagctccc  
ggcaacaattaatagactggatggaggcggataaagttgcaggaccactctgcgctcgcccttccggctggctgtttattgctgataaatctggagccgggtgag  
cgtgggtctcgcggtatcattgcagcactggggccagatggttaagccctcccgatcgtatgtatctacacgacggggagtcaggcaactatggatgaacgaaata  
gacagatcgctgagataggtgcctcactgattaaagcattgtaactgtcagaccaagttactcatatacttagattgatttaaaactcatttttaattaaaaggatct  
aggtgaagatccttttgataatctcatgacaaaaatcccttaacgtgagtttctgtccactgagcgtcagaccccgtagaaaagatcaaaagatcttcttgagatcctt  
ttttctgcgcgtaatctgctgcttgcaacaaaaaaaccaccgctaccagcgggtgtgttggccgatcaagagctaccaactcttttccgaaggtaactgcttc  
agcagagcgcagataccaataactgtccttctagttagccgtagttagccaccactcaagaactctgtagcaccgcctacatactcgtctgctaatcctgttac  
cagtggtctgctgccagtgccgataagtcgtgtcttaccgggttgactcaagacgatagttaccggataaggcgcagcggctgggctgaacggggggtcgtgc  
acacagcccagcttgagcgaacgacacacgaactgagatactacagcgtgagctatgagaagcgccacgctcccgaaggagaaaggcggacag

gtatccggttaagcggcagggctggaacaggagagcgcacagggagcttccaggggaaacgcctggtatctttatagtcctgtcgggttcgccacctgtgact  
tgagcgtcgattttgtgatgctcgtcagggggggcggagcctatggaacacgcgacgaacgcggccttttacgggttcctggcctttgtgacctttgtcacatg  
ttcttctcgtgtatccccgtattctgtggataaccgtattaccgctttgagtgagctgataccgtcgcgcgagccgaacgaccgagcgagcgagtgatgagc  
gaggaagcgaagagcgcctgatcggtatcttcttaccgcatctgtcgggtatttccacccgcatatatggtgactctcagtaacatctgctctgatccgcata  
gttaagccagtatacactccgctatcgtacgtgactgggtcatggctgcgcggcggacacccgccaacacccgctgacgcggcctgacgggcttctgtcctccg  
gcatccgcttacagacaagctgtgacctctccgggagctgcatgtgtcagagggtttaccgtcatcaccgaaacgcgcgagggcagctgcggtaagctcata  
gcgtggtcgtgaagcgattcacagatgtctgctgttcatccgctccagctcgttgagtttccagaagcggttaatgtctggttctgataaagcgggcatgttaa  
ggcggttttttctgtttggtcactgatgctcctgtaagggggatttctgtcatggggtaatgataccgatgaaacgagagaggatgctcacgatacgggttac  
tgatgatgaacatgcccgttactggaacgttgtgagggtaaacactggcggtatgagtgcgggcggaccagagaaaaatcactcagggtcaatgccagcgctt  
cgtaatacagatgtaggtgttccacagggtagccagcagcatcctgcgatgcagatccggaacataatggtgcagggcgctgacttccgcgtttccagactttacg  
aaacacggaaaccgaagaccattcatgttgtcaggtcgcagacgttttgcagcagcagtcgcttcacgttcgctgcgtatcggtgattcattctgtaaccagt  
aaggcaaccccgccagctagccgggtcctcaacgacagggagcagcatcgcgcacccgtggggcgccatgcccggcgataatggcctgcttctgcgcgaa  
acgtttggtggcgggaccagtgacgaaggctgagcgaggcggtgcagattccgaataccgaagcgacagggcgatcatcgtcgcgtccagcgaaagcg  
gtcctcggcgaacatgaccagagcgtgcgcggcactgtctacgagttgcatgataagaagacagtcataagtgcggcgacgatagtcaccccgcgccc  
accggaaggagctgactgggtgaaaggctcgaaggcctcgtcgaatcccggtgcctaagtgtgagtaacttaacttaactgcttgcgtcactgcccgc  
ttccagtcgggaaacctgtcgtgcccagctgcatatgaatcggcaacgcgcgggagagggcggttgcgtatggcgccagggtggtttttttaccagt  
gagacgggcaacagctgattgcccctaccgctggcctgagagagttgcagcaagcggtccacgtggttggcccgacggcgaaatcctgtttgatggg  
gttaacggcggggataaactgatgtcttctggtatcgtcgtatccactaccgagatataccgaccaacgcgcagcccgactcggtaatggcgcgacttgcgc  
ccagcgccatctgatcgttggaaccagcatcgagtggaacgatgccctcattcagcatttgcattgttggaaacggacatggcactccagtcgccttc  
cgttccgctatcggctgaatttattgagtgagtgagatattatgccagccagccagacgcagacgcgcgagacagaacttaaggcccgctaacagcgcgattt  
gctggtgacccaatgcgaccagatgctccacggcagtcgctaccgtctcatgggagaaaataactgttgatgggtgtctgtgcagagacatacgaataa  
cgccggaaacattagtcaggcagcttccacagcaatggcatcctggtcatccagcggaatgtaatgatcagccactgacgcgttgcgcgagaagattgtgcac  
cgccgctttacaggcttcgacgcggcttcttaccatcgacaccaccacgctggcaccagttgatcggcgcgagatttaacgcccgcgacaatttgcgacggc  
gcgtgcagggccagactggaggtggcaacgcaacgactgtttggcccgccagttgttgccacgcggttgggaatgtaattcagctccggccatcgcc  
gttccactttttccgcgttttcgcagaaactgtgctggcctggttaccacgcgggaaacggtctgataagagacaccggcactactctgcgacatcgtataact  
actggtttcacattaccacctgaattgactcttccggcgctatcatgccataccgcgaaagggttttgcgcattcgtatggtgtccgggatctcgcgctctccct  
tatgcgactcctgattaggaagcagccagtagtaggttgaggccgttgagcaccgcgcgcaagggaatggtgcatgcaaggagatggcgcccaacagctcc  
ccggccacggggcctgccaccataccacgccgaacaagcgctcatgagccgaagtggcgagcccgatctccccatcggtgatgtcggcgatataggcg  
ccagcaaccgcacgtgtggcgccggtgatggcgccacgatgcgtccggcgtagaggatcgagatctcgtatcccgcaaatatacgaactactataggggaa  
ttgtgagcggataaactccctctagaataattttgttaactttaagaggagatacatatggctagcatgactgttgagacgaaatgggtcgcggatccat  
ggcgacccgtgtgttgcgaccgcgaccgtgcgtcggttaagggtcgttaaacgtattccgaccgtgcggcgctgaccctgaccccgccggcggtgctgcgt  
attaagacctgctgcaggacaacccgataatgttggctgaaagtggcgcttcacacgtgttgcaacggcctgagctacacctggaactatgcgagccag  
aaggacaaactgtagggaagtgttcaagacgtgtgaaagtttcatcgataagaagcgagctgagcctgctggcgaccgagatgatttttggaagc  
aagctgagcagcgatgtttaaacaacccgaacattaaaggcaccctgcggttgcggcgaaagcttcagcatgtaactgagcaccaccaccaccactga  
gatccggctgtaacaaagccgaaaggagctgagttggctgctgccaccgctgagcaataactagcataacccttggggcctctaaacgggtcttgagggggt  
tttttctgaaaggaggaaactatataccgat-3'

**pET-21a(+) with dMagR-his (target with start and stop codon is underlined)**

5'-

tggcgaatgggacgcgccctgtagcggcgcatgaagcgcgggggtgtggtgttacgcgcagcgtgaccgtacacttgccagcgccctagcggcgctcctt  
tcgctttcttcccttcttctcggcacgttcggcggttccccgtcaagctctaaatcgggggtccttttaggggtccgatttagtctttacggcacctcgacccca  
aaaaacttgattaggggtgatgttcacgtatgggccatcgccctgatagacgggttttcgccctttgacgttggagtcacgttcttaatagtggaactctgttccaaa  
ctggaacaacactcaaccctatctcggctatcttttgatttataagggttttgcgatttcggcctattggttaaaaaatgagctgatttaacaaaaatgaacgcgaat  
ttaacaaaaatataactgttacaatttcaggtggcacttttcggggaaatgtgcgcggaacccctatttgttttttctaaatacattcaaatatgtatccgctcatgaga  
caataaccctgataaatgcttcaataattgaaaaagggaagatgagatttcaacatttccgtgtcgccttattcccttttttgcggcattttgccttctgttttgcctc  
accagaaacgctgggtgaagtaaaagatgctgaagatcagttgggtgcacgagtggttcatcgaactggatctcaacagcggttaagatccttgagagttttc  
ccccgaagaacgttttccaatgatgacacttttaaagtctgtatgtggcgcggtattatcccgattgacggcggaaggaactcggcgccgcatacacta  
ttctcagaatgacttggttgagtactaccagtcacagaaagcatcttaccggtgcatgacagtaagaagaattatgcagtgctgccataacctgagtgataacac  
tgcggccaacttacttctgacaacgatcggaggaccgaaggagctaacccgtttttgcacaacatgggggatcatgtaactgccttgatcgttgggaaccggag  
ctgaatgaagccatacacaacgacgagcgtgacaccacgatgcctgcagcaatggcaacaacgttgcgcaactattaactggcgaactacttactctagcttccc  
ggcaacaattaatagactggatggagggcgataaagttgcaggaccacttctgcgtcggcccttccggctgctgttattgctgataaacttgagccgggtgag  
cgtgggtctcgcggatcattgcagcactggggccagatggttaagccctccgctatcgtatgtatctacacgacggggagtcaggcaactatggatgaacgaaata  
gacagatcgtgagataggtgctcactgattaaagcattgtaactgtcagaccaagtttactcatatacttttagattgatttaaaacttatttaatttaaaggatct  
aggtgaagatccttttgataatctcatgacaaaaatcccttaacgtgagtttctgtccactgagcgtcagaccccgtagaaaaatgaagatcttcttgatcctt  
tttttctgcgtaatctgctgcttgcacaaaaaaaccaccgctaccagcggtgtgttgggttgcggatcaagagctaccaactcttttccgaaggtaactgcttc  
agcagagcgcagataccaatactgtcttcttagtgagccgtagttaggccaccacttcaagaactctgtgacccgctacatacctcgtctgtaactctgttac

cagtggctgctgccagtggcgataagtcgtgtcttaccgggttgactcaagacgatagttaccggataaggcgagcggctgggctgaacggggggttcgtgc  
acacagcccagcttggagcgaacgacctacaccgaactgagatactacagcgtgagctatgagaaagccacgcttcccgaaggagaaaggcggacag  
gtatccggtaagcggcagggtcggaaacaggagagcgcacgagggagcttccaggggaaacgcttggatctttatagctctgtcgggttccacacctgtact  
tgagcgtcgtattttgtatgctcgtcagggggcgagcctatggaaaacgccagcaacgcggccttttacgggttctggccttttctggtcctttgtcacatg  
ttcttctcgtgttatccccgtattctgttgataaccgtattaccgctttgagtgagctgataccgctcggcgagccgaacgaccgagcgagcagtgagtgagc  
gaggaagcggagagcgctgatcggtattttctccttacgcatctgtcggtattttacaccgcatatatgggtgactctcagtaaatctgctctgatccgcata  
gttaagccagtatacactccgctatcgtacgtgactgggtcatggctgcggccgacaccgccaacacccgctgacgcgcttgcgggcttctgtctccg  
gcctccgcttacagacaagctgtgaccgtctccgggagctgcatgtgtcagagggtttaccgctacaccgaaacgcgcgagggcagctgcggtaagctcatca  
gcgtggctgtgaagcgattcacagatgtctgctgttccatccgctccagctcgttgagtttccagaagcgtaaatgtctggttctgataaagcgggccaatgttaa  
gggcggttttctgttggctactgtgctcctgtgtaagggggatgttctgttcatggggtaagtataccgatgaaacgagagaggtgctcacgatacgggttac  
tgatgatgaacatgcccgttactggaacgttgtgagggtaaacactggcggatgagtgcgcggggaccagagaaaaatcactcagggtcaatgccagcgctt  
cgttaatacagatgtaggtgttccacagggtagccagcagcatcctgcgatgcagatccggaacataatgtgagggcgctgacttccggttccagactttacg  
aaacacggaaaccgaagaccattcatgttgtctcaggtcgcagacgttttgcagcagcagctgcttcacgttgcgtcgcgtatcgggtattcattctgctaaccagt  
aaggcaaccccgccagcctagccgggtcctcaacgacaggagcagcatcgtcgaccggtggggcgccatgcccggcgataatggcctgcttctcggcgaa  
acgtttggtggcgggaccagtgcgaagcgtgagcgagggcgctgcaagattccgaataccgcaagcgacaggccgatcctgcgcgtccagcgaaagcg  
gtctcgcggaaatgaccagagcgctgcccgcacctgtctacgagttgcatgataaagaagacagtcataagtgcggcgacgatagtcacccccgcggcc  
accggaaggagctgactgggtggaagctctcaaggcatcgttcgagatcccggtgcctaagtgtgagctaaacttcaattatgcttgcgtcactgcccgc  
ttccagtcgggaaacctgtcgtgcccagctgcatatgaatgcgccaacgcgggggagagggcggtttgcgtattggcgccagggtggttttcttaccagt  
gagacgggcaacagctgattgcccctaccgctggccctgagagagttgcagcaagcggtccacgctggttggcccgacaggcgaaatcctgtttgatggg  
gttaacggcgggataataatgagctgtcttccgtatcgtgtatccactaccgagatataccgaccaacgcgcagcccggactcggtaatggcgcgcatgctgc  
ccagcgccatctgatcgttggaaccagcatcgcagtggaacgatgccctcattcagcatttgcattggttggtaaaaccggacatggcactccagtcgccttc  
cgttccgctatcggctgaatttgaatgagtgagatattatgccagccagccagacgcagacgcggcgagacagaacttaatgggcccgttaacagcgcgattt  
gtgtgtgaccaatgcgaccagatgctccacggcagtcgcgtaccgtctcatgggagaaaataactgttgaatgggtgtctgtgcagagacatacgaataa  
cgccggaaacattagtcaggcgagcttccacagcaatggcatcctggtcatccagcggaatagtaatgatcagcccactgacgcgttgcgcgagaagattgtgcac  
cgccgctttacagggttcgacgcgcttctgttaccatcgcacaccaccacgctggcaccaggtgatcggcgcgagatttaacgcccgcgacaatttgcgacggc  
gcgtgcagggccagactggaggtggcaacgccaatcagcaacgactgttggcccgccagttgtgtgcacgcggttgggaatgtaattcagctccgccatcgcc  
gttccacttttccgcgttttcgcagaaacgtggtcgtggttcaccacgcgggaaacggtctgataagagacaccggcatactctgcgacatcgtataacgtt  
actggttccattaccacctgaattgactcttccggcgctatcatgccataccgcgaaagggtttgcgccattcgtatggtgtccgggatctcgcgctctccct  
tatgcgactcctgcataggaagcagcccagtagtaggttgaggccgttgagcaccgcccgcgaaggaatggtcatgcaaggagatggcgccaacagctcc  
cccggccacggggcctgccaccataccacgccgaacaagcgctcatgagcccgaagtggcgagcccgatcttccccatcggtgatgtcggcgatataggcg  
ccagcaaccgcacctgtggcgccggtgatgccggccacgatgcgtccggctagaggatcgagatctcgcgaaatatacgaactactataggggaa  
ttgtgagcggaataaattcccctctgaaataatttgttaactttaagaaggagatacatatggctagcatgactggtggacagcaaatgggtcgcggatccat  
ggcgaccggtgtgttgcgaccgcgaccgtgcgtcggttaagggtcgtaaaactgattccgaccggtcgggcgctgaccctgaccccgccgcggtgctgcgt  
attaagaccctgctcgaggacaaacccgataatggttggctgaaagtggcgcttcgtaacggttgcacggcctgagctacacccctgactatgcgagccag  
aaggacaaactggatgaggaagtgttcaagcggtgtgaaagttttcatcgataaagaaagcgagctgagcctgctggcgaccgagatggatttttggaaagc  
aagctgagcagcgatgtcttttaacaacccgaacattaaaggcacctgcggttgcggcgaaagcttcagcatgctcgagcaccaccaccaccactgagat  
ccggctgtaacaaagcccgaaggaagctgagttggctgctgccaccgctgagcaataactagcataacccttggggcctctaaccgggtcttgagggggtttt  
tctgaaaggaggaactatatccggat-3'

# pET-21a(+) with cIMagR (target with start and stop codon is underlined)

5'-

tggcgaatgggacgcgccctgtagcggcgcatgaagcgcgcggtgtggtggttacgcgcagcgtgaccgctacacttgcagcgccctagcgcccgctcctt  
tcgttttcttcccttcttctcgcacgttcgcccgttccccgtcaagctctaaatcgggggtcctttaggggtccgatttagtctttacggcacctcgacccca  
aaaaacttgattaggggtgatggttcacgtatgggccatcgcctgatagacgggttttgcctttagcgttggagtcacgcttcttaataggactctgttccaaa  
ctggaacaacactcaacccctatctcggctattctttgatttataagggtatttgcgatttgcgctattggttaaaaaatgagctgatttaaaaaaatttaacgcgaat  
ttaaaaaaatttaacgtttacaatttcaggtggcacttttggggaaatgtgcgcggaacccctatttgttttttctaatacattcaaatatgtatccgctcatgaga  
caataacccgtataatgcttcaataattgaaaaaggaagagtagtatttcaacatttccgtgtcgccttattccctttttgcggcattttgccttctgttttgc  
accagaaacgctggtgaaagttaaagatgctgaagatcagttgggtgcacgagtggttaccatcgaactggatctcaacagcggttaagatccttgagagtttgc  
ccccgaagaacgttttcaatgatgagcacttttaaaagtctgctatgtggcgcggtattatcccgtattgacggcggaaggaactcggctcggcgatacacta  
ttctcagaatgacttgggtgagtactaccagtcacagaaaagcatcttaccgagtgccatgacagtaagagaattatgcagtgtcgcataacctagtgataaac  
tgcggccaacttacttctgacaacgatcggaggaccgaaggagctaacgcgtttttgcacaacatgggggatcatgtaactgccttgatcgttgggaaccggag  
ctgaatgaaggcataccaacgacgagcgtgacaccacgatgcctgcagcaatggcaacaacgttgcgcaactattaactggcgaactacttactctagcttccc  
ggcaacaattaatagactggatggaggcgataaagttgcaggaccacttctgcgtcggcccttccggctgctggtttattgctgataaatcggagccggtgag  
cgtgggtctcgcggatcattgcagcactggggccagatggttaagccctcccgtatcgtatttatcacacgaggggagtcaggaactatggatgaacgaaata  
gacagatcgtgagataggtgctcactgattaagcattgtaactgtcagaccaagttactcatatatactttagattgatttaaaactcatttttaattaaaggatct  
aggtgaagatccttttgataatctcatgacaaaaatcccttaacgtgagtttcttccactgagcgtcagaccccgtagaaaaatcaaggtatcttctgagatcctt

ttttctgcgctaactctgctgcttgaacacaaaaaaccaccgctaccagcggtggtttgttgcggatcaagagctaccaactcttttccgaaggtaactggcttc  
agcagagcgcatatacctaactgtcttctagttagccgtagttagccaccacttcaagaactctgtagcaccgctacatactcgtctgtaactctgttac  
cagtggctgctgccagtgccgataagtcgtgtcttaccgggttgactcaagacgatagttaccggataaaggcgagcggttcgggctgaacggggggttcgtgc  
acacagcccagcttgagcgaacgacctacaccgaactgagatactacagcgtgagctatgagaaagcggcagcttcccgaaggagaaaggcggacag  
gtatccggtaagcggcagggtcggaacaggagagcgcacgagggagcttccagggggaaacgcctggtatctttatagctctgctgggttcgccacctgtgact  
tgagcgtcgatgtttgtgatgctcgtcagggggcgagcctatggaacacggcgaacgcggccttttacgggttctggcctttgtggttcgtcacatg  
ttcttctgctggtatccccgtattctgtgataaccgtattaccgctttgagtgagctgataccgctcggcgagccgaacgagcagcgagtgagtgagc  
gaggaagcgaagagcgctgatgcggtatcttctcttacgcatctgtgcggtatttccacccgcatatagggtgactctcagtaactctgctctgatccgcata  
gttaagccagtatatactccgctatcgtacgtgactgggtcatggctgcgccccgacaccgccaacacccgctgacgcgccctgacgggctgtctgctccc  
gcatccgcttacagacaagctgtgacctctccgggagctgcatgtgcagaggttttaccgtatcaccgaaacgcgcgagggcagctgcggtaaagctcatca  
gcgtggctgtgaagcgattcacagatgtctgctgttccatccgcgtccagctcgttgagtttccagaagcgttaattgtctggttctgataaagcgggcatgttaa  
ggcggttttttctgttgcactgagcctcgtgtaagggggatttctgttcatgggggttaataccgatgaaacgagagaggtatgctacgatacgggttac  
tgatgatgaacatgcccgggttactggaacgttgtgagggtaaacactggcggatggtatgcggcgggaccagagaaaaatcactcagggtcaatgccagcgctt  
cgtaatacagatgtaggtgttccacagggtagccagcagatcctgcgatgcagatccggaacataatgtgcagggcgctgacttccgcttccagactttacg  
aaacacggaaaccgaagaccattcatgttgtctcaggtcgcagacgttttgcagcagcagtcgcttcacgttcgctcgcgtatcggtgattcattctgtaaccagt  
aaggcaaccccgccagctagccgggtctcaacgacaggagcagcatcgcgacccgtggggccgccatgccggcgataatggcctgcttctcgcggaa  
acgtttggtggcgggaccagtgcgaaggttgagcgagggcggtgcaagattccgaataccgcaagcgacaggccgatcatcgtcgcgtccagcgaaagcg  
gtctcgcggaaatgaccagagcgctgcccggcactgtctacgagtgcatgataaagaagacataagtcggcgacgatagtcacccccgcggcc  
accggaaggagctgactgggtggaaggtctcaaggcatcggctgagatccgggtgctaatgagtgagctaaactacattaatgcttgcgtcactgcccgc  
ttccagtcgggaaacctgtcgtgccagctgcattatgaatcggccaacgcgcggggagagcggttgcgtattggcgccagggtgtgtttttttaccagt  
gagacgggcaacagctgattgcccttaccgctggcctgagagagtgtagcaagcggtccacgctggttggcccgacagcgaaatcctgtttgatggtg  
gttaacggcgggatataacatgagctgtctcgttatcgtgtatccactaccgagatataccgaccaacgcgcagcccgactcggtaatggcgcgcatgctgc  
ccagcgccatctgatcgttggaaccagatcgcagtggaacgatgccctcattcagcatttgcatggttgttgaaacccggacatggcactccagtcgccttc  
cgttccgctatcggctgaattgattgagtgagatattatgccagccagccagacgcagacgcggcgagacagaactaatgggcccgttaacagcgcgattt  
gctgtgacccaatgcgaccagatgctccacggcagtcgcgtaccgtcttcatgggagaaaataactgttgatgggtgtctgtcagagacatcaagaaataa  
cgccggaacatttagtcagggcagcttccacagcaatggcatcctgtgtatccagcgagatagttatgatcagccactgacgcgttgcgcgagaagattgtgcac  
cgccgctttacaggttcgacgcgcttcgttaccatcgcacaccaccacgctggcaccaggttgatcggcgagatttaatcggcgacaatttgcgacggc  
gcgtgcagggccagactggaggtggcaacgccaatcagcaacgactgttggcccgccagttgtgtgcacgcggttgggaatgtaattcagctccgccatcgc  
gttccactttttccgcgttttcgcagaaacgtggtggcctgttcaccacgcgggaaacggtctgataagagacaccggcactactctgcgacatctataacgtt  
actggttccattcaccacctgaattgactcttccggcgctatcatgccataccgcgaaagggttgcgccattcgtatggtgtccgggatctcgcgctctccct  
tatgcgactcctgattaggaagcagccagtagtaggtgagggcgttgagcaccgcccgcgaaggatggtgcatgcaaggagatggcgcccaacagctcc  
cccggccacggggcctgccaccataccacgccgaacaagcgtcatgagcccgaagtggcgagcccgatcttccccatcggtgatgtcggcgatataggcg  
ccagcaaccgcacgtgtggcgccggtgatgccggccacgatgcgtccggcgtagaggatcgatctcgcgatcccgcaaatataacgactactataggggaa  
ttgtgagcggataacaattccccctctagaaataatttgttaactttaagaaggagatacatatggctagcatgactggtggacagcaaatgggtcgcggatccat  
gcccggcgcggttcgggtctgtcgggtctgcgtcgtgtaccagccccgcacatggtgcggcggttccgggtaccctggtgtggacccccgagcgcggttaccg  
aagatcaaaagcgtgctgaaggacaaacccgaacacgtgggtgttaaatgtggcggttcgtaccggtgttgcacggcctgagctacacctggagtataccaa  
gagcaaaaggtgacagcgatgaggaaagtggttcaggatggcgtgcgtgttttcaatgaaagaaagcgcaactgacctgctgggtaccgagatggactacgtgg  
aagataagcgtgagcagcgagttcgttttaacaacccgaacatcaaaagccacgtgcgggtgcggcgaaagcgtttaacatttaactc  
ctgagatccggtgtaacaaagccgaaaggaagctgagttggctgctgccaccgctgagcaataactagcataaaccccttggggccttaaacgggtcttgag  
gggtttttgctgaaaggaggaaactatcggat-3'

# **pET-21a(+) with cIMagR-his (target with start and stop codon is underlined)**

5'-

tgcggaatgggacgcgcctgtagcggcgcatgaagcgcgcggtgtggtgttacgcgcagcgtgaccgctacacttgccagcgccctagcgcccgtcctt  
tcgttttctcccttcttctcgcacgttcgcccgttcccccgtcaagctctaaatcgggggtccttctttaggggtccgatttagctttacggcacctcgacccca  
aaaaacttgattaggggtgatggttcacgtagtgggcatcgcctgatagacggtttttgccctttgacgttggagtcacgcttcttaatagtggaactctgttccaaa  
ctggaacaacactcaacccatctcggctattcttttgattataagggtatttgcgatttcggcctattggttaaaaaatgagctgatttaacaaaaatfaacgcgaat  
ttaacaaaaatfaacgtttacaatttcaggtggcacttttcggggaatgtgcgcggaacccctatttgtttatttttctaatacattcaaatatgtatccgctcatgaga  
caataacctgataaatgctcaataatattgaaaaaggaaagatgagatttaacatttccgtgtcgccttattcccttttttgcggcattttgccttctgttttgcctc  
accagaacgctgggtgaaagttaaagatgctgaagatcagttgggtgcacgagtggtttacatcgaactggatctcaacagcggtgaagatccttgagagtttgc  
ccccgaagaacgtttccaatgatgacacttttaaggttctgctatgtggcgcggtattatcccgtattgacgccggcgcaaggaactcggcgcgcatacacta  
ttctcagaatgacttgggtgagtaactaccagtcacagaaaagcatcttaccggatggcatgacagtaagagaattatcgagtgtgccataacctagtgatgaacac  
tgcgcccaacttacttctgacaacgatcggaggaccgaaggagctaacgcgtttttgcacaacatgggggatcatgtaactcgccttgatcgttgggaaccggag  
ctgaatgaagccataccaacgacgagcgtgacaccacgatgcctgcagcaatggcaacaacgttgcgcaactatttaactggcgaactacttactctagcttccc  
ggcaacaatfaatagactggatggagggcgataaagttgcaggaccacttctgcgtcggcccttccggctggctggtttattgctgataaatctggagccggtgag  
cgtgggtctcgcgggtatcattgcagcactggggccagatggtaagccctcccgtatcgtatgtatctacacgacggggagtcaggaactatggatgaacgaaata

gacagatcgctgagataggtgcctcactgattaagcattggaactgtcagaccaagttactcatatatacttttagattgattaaaaacttcatttttaattaaaaggatct  
aggtgaagatccttttgataatctcatgacaaaaatcccttaacgtgagttttgttccactgagcgtcagaccccgtagaaaaatcaaaagatcttcttgagatcctt  
ttttctgcgcgtaatctgctgcttgcacaaaaaaaccaccgctaccagcgggtgttgggttccggatcaagagctaccaactcttttccgaaggtaactggttc  
agcagagcgcagataccaatactgtccttctagtgtagccgtgtagggccaccacttcaagaactctgtagcaccgctacatacctcgtctgtaactctgttac  
cagtggctgctgccagtggcgataagtcgtgtcttaccgggttgactcaagacgatagttaccggataaggcgagcgggtcgggctgaacggggggttcgtgc  
acacagcccagcttgagcgaacgacctacaccgaactgagatacctacagcgtgagctatgagaaagccacgcttcccgaaggagaaagcgcgacag  
gtatccggtaagcggcagggctcggaacaggagagcgcacgagggagcttccaggggaaacgcctgtatctttatagctctgctgggttcgccacctgtact  
tgagcgtcgtattttgtgatgctcgtcagggggcgagcctatggaaaaacgccagcaacgcggccttttacgggttcttggccttttgcgtggcctttgtcacatg  
ttctttctgcgttatccctgattctgtggataaccgtattaccgcctttgagtgagctgataccgctcggcgagccgaacgaccgagcgcagcagtgactgagc  
gaggaagcgaagagcgcctgatgcggtattttctccttacgcactgtgtcgggtatttccacccgcatatatgggtgactctcagtacaatctgctctgatccgcata  
gttaagccagtatacactccgctatcgtactgtgactgggtcgtgcggccgacacccgcaacacccgctgacgcgcttgcagggctgtctgtctccg  
gcatccgcttacagacaagctgtgaccgtctccggagctgcatgtgtcagaggttttaccgctatcaccgaaacgcgcgagggcagctgcggtaaagctcatca  
gctgtgtcgtgaagcgattcacagatgtctgctgttcatccgcgtccagctcgttgggtttccagaagcgtaatgtctggttctgtataaagcgggcatgttaa  
ggcggttttttctgtttgtcactgtgcctccgtgtaagggggatttctgttcatgggggtaatgataccgatgaaacgagagaggtatcagcagatccgggttac  
tgatgatgaacatgccgggttactggaacgttgtgagggtaaaactggcggtatggatgcggcgaggaccagagaaaaatcactcagggtcaatgccagcgtt  
cgttaatacagatgtaggtgttccacagggtagccagcagcactcgtcgtatgcagatccggaacataatgtgcagggcgctgacttccggttccagactttacg  
aaacacggaaaccgaagaccattcatgttgtgtcaggtcgcagacgttttgcagcagcagtcgttccacgttcgctcgcgtatcgggtattcattctgtaaccagt  
aaggcaaccccgccagcctagccgggtcctcaacgacaggagcagcatcgtcgcacccgtggggcgccatgccggcgataatggcgtgttctcgcggaa  
acgtttgtgtggcgaggaccagtgcgaaggttgagcgaaggcggtgcaagattccgaataaccgaagcgacaggccgatcatcgtcgcgtccagcgaaagcg  
gtcctcggcgaaaaatgaccagagcgtcgcggcacctgtctacgagttgcatgataaagaagacagtcataagtgcggcgacgatagtcacccccgcggc  
accggaaggagctgactgggttgaaggctctcaaggcatcggctgagatccgggtgcctaatagtgtgagctaaactacattaatgtcgttgcgtcactgcccgc  
ttccagtcgggaaacctgtcgtgccagctgcattaatgaatcgccaaacgcgcggggagagcggtttgcgtattggcgccagggtgtgttttctttaccagt  
gagacgggcaacagctgattgcccttaccgcctggccttgagagagttgcagcaagcggtccacgctgtgttgcggcagcggaaatcctgtttgatgggtg  
gttaacggcgggataataatgagctgtcttcggtatcgtgtatccactaccgagatataccgcaccaacgcgcagcccgactcggtaatggcgcgcatgtgcg  
ccagcgccatctgatcgttggcaaccagcatcgcagtgggaacgatgccctcattcagcatttgcattggtttgtgaaaaccggacatggcactccagtcgccttc  
cgttccgctatcgggtgaatttgattgcgagtgagatatttatgcagccagccagacgcagacgcggcagacagaacttaattggggcgtaacagcgcgattt  
gtgtgtgacccaatgcgaccagatgctccacgccagtcgcgtaccgtcttcatgggagaaaataatactgttgatgggtgtctgtcagagacatcaagaaataa  
cgccggaaacattagtgcagggcagcttccacagcaatggcatcctgtgtatccagcggatagttaatgatcagccactgacgcgttgcgcgagaagattgtgcac  
cgccgttttacagggttcgacgcgcttcgttctaccatcgcacaccaccacgctggcaccaggttgcgcgcgagatttaatcgccgcgacaatttgcagggc  
gcgtgcagggccagactggaggtggcaacgccaatcagcaacgactgtttgcccgccagttgtgtgccacgcggttgggaatgtaattcagctccgccatcggc  
gttccactttttccgcgttttcgcagaaacgtggctggcctgtgtcaccacgcgggaaacgggtctgataagagacaccggcactactctgcgacatctataacgtt  
actgtttcacattcaccacctgaattgactcttccggcgctatcatgccataccgcgaaagggttttgcgccattcgtatgtgtccgggatctcgcgctctcct  
tatgcgactcctgcattaggaagcagccagtagtaggttgaggccgttgagcaccgcccgcgaaggatgtgcatgcaaggagatggcgcccaacagtc  
ccggcgccagggcgctgccaccataccacgccgaacaagcgtcatgagcccgaagtggcgagcccgatcttccccatcggtgatgtcggcgatataggcg  
ccagcaaccgcacctgtggcgccggtgatccggccacgatgcgtccggcgtagaggatcagatctcgtatcccgcaaaataatcagactactataggggaa  
ttgtgagcggataacaatccctctagaaataattttgttaactttaagaaggagatatacatatggctagcatgactgttggacagcaaatgggtcgcggatccat  
gccggcgcggttccgggtctgtcggctcgtcgtgtgtaccagccccacatggtccggcggttccgggtaccctggtgtggacccccagcgcggttacg  
aagatcaaaagagctgctgaaggacaaaaccggaacagctgggtgttaagtggcggttcgtacccgtgttgcacggcctgagctacacccctggagtataccaa  
gagcaaaagtgacagcgtgaggaagtgttccaggtggcgtgcgtgtttcattgaaaagaaagcgcaactgacctgctgggtaccgagatggactacgtgg  
aagataagctgagcagcgagttcgttttaacaacccgaacatcaaaaggcacctgcgggttcggcgaaagccttaacattctcagcaccaccaccaccactg  
agatccggctgtaacaagcccgaaggagctgagttggctgtgccaccgctgagcaataactagcataacccttggggcctctaaacgggtcttgagg  
gttttttgcgtgaaaggaggaactatatccggat-3'

### 3. Additional SDS-PAGE investigations

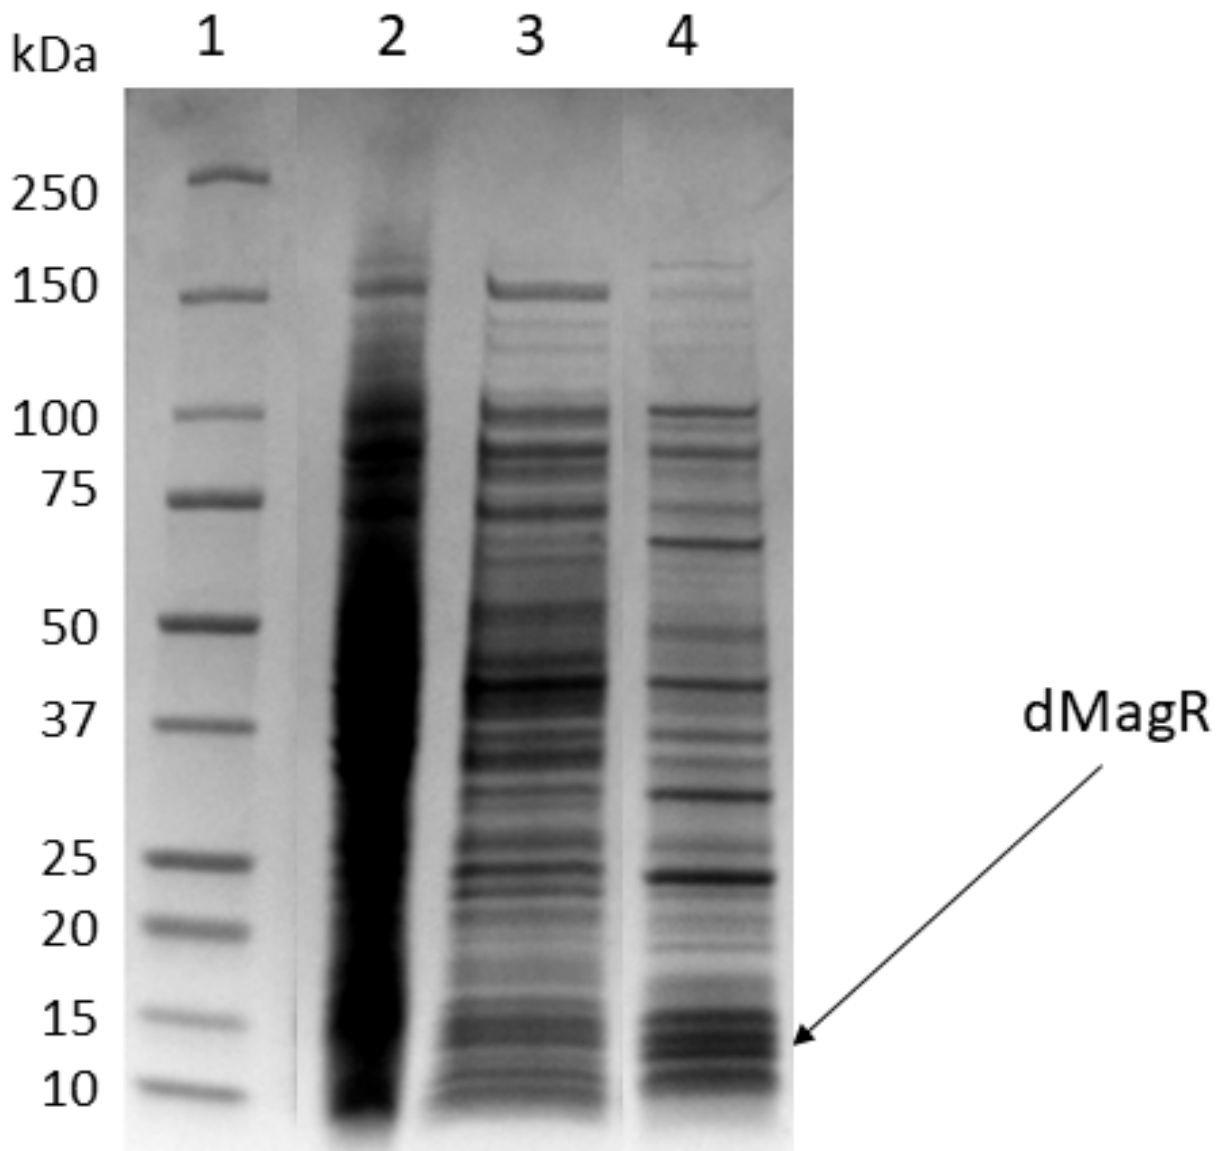

**Supplementary Figure S1.** SDS-PAGE analysis to test dMagR capture with beads. lane 1: standard protein ladder; lane 2: 4  $\mu$ L solubilized cell pellet of BL21-dMagR lane 3: supernatant of 11 g L<sup>-1</sup> BL21-dMagR cell disruption; lane 4: bead precipitated proteins after washing of beads

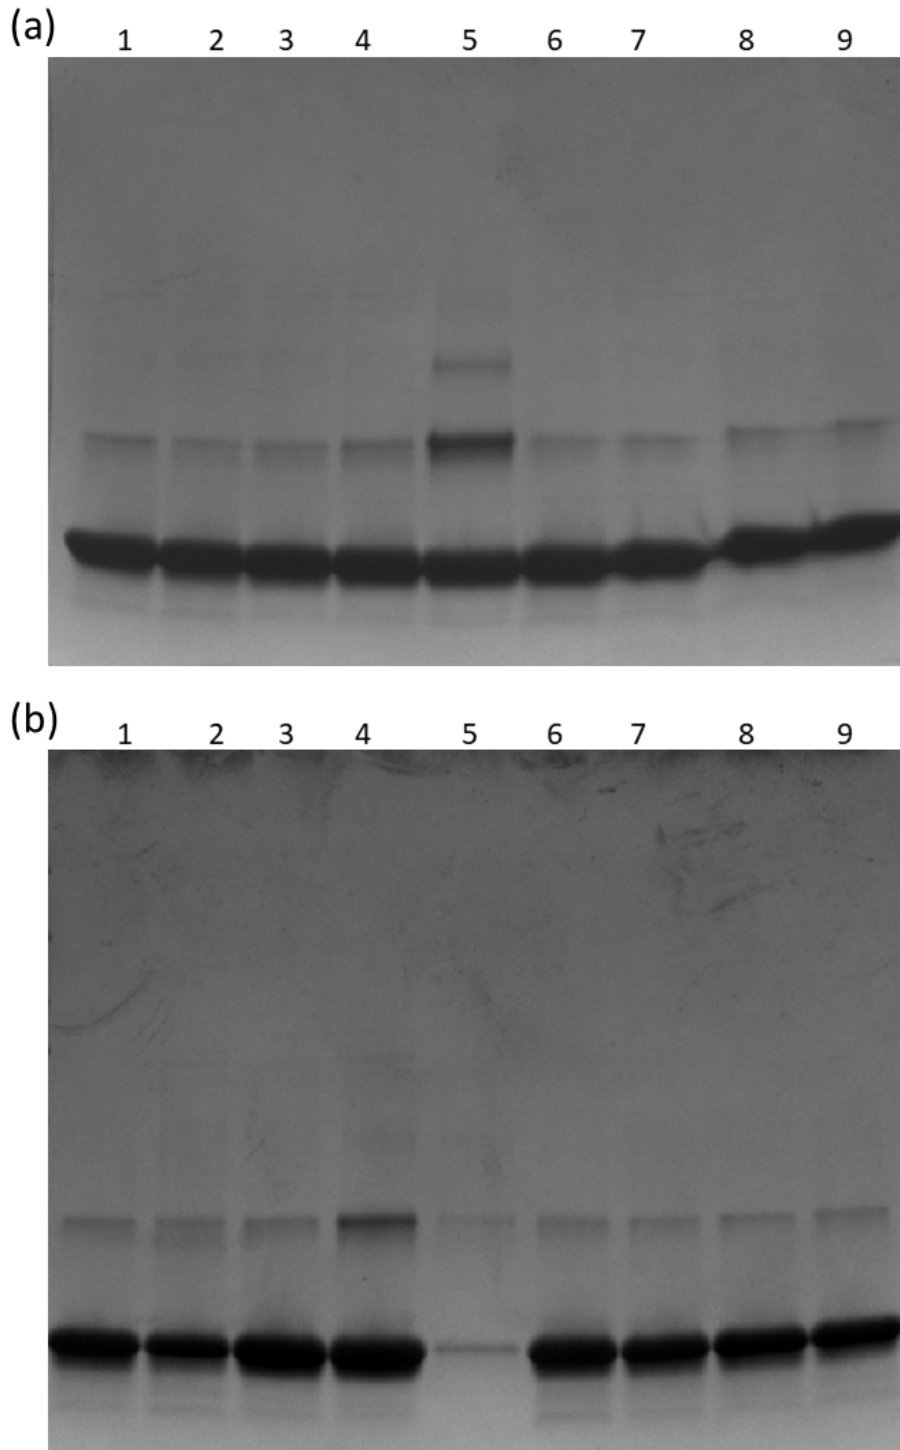

**Supplementary Figure S2.** SDS-PAGE analysis of dMagR-his capture with magnetic beads under different conditions. (a) SDS-PAGE of purified dMagR-his diluted in respective buffers before contact with magnetic beads. 11.25  $\mu$ L of sample were applied per lane. (b) SDS-PAGE of bead precipitated proteins after washing of beads. 7.5  $\mu$ L of sample were applied per lane. dMagR-his samples in (a) and (b) were used with the following buffers: Buffers in lane 1 – 5 represent pH gradient from 5 – 12 and contained 150 mM NaCl. Lane 1: pH 7.5; Lane 2: pH 5.0; Lane 3: pH 9.0; Lane 4: pH 11.0; Lane 5: pH 12.0. Buffers in lane 6 – 9 represent samples with increasing salt at pH 7.5. Lane 6: 0 mM NaCl; Lane 7: 1000 mM NaCl; Lane 8: 2000 mM NaCl; Lane 9: 1000 mM  $(\text{NH}_4)_2\text{SO}_4$ .



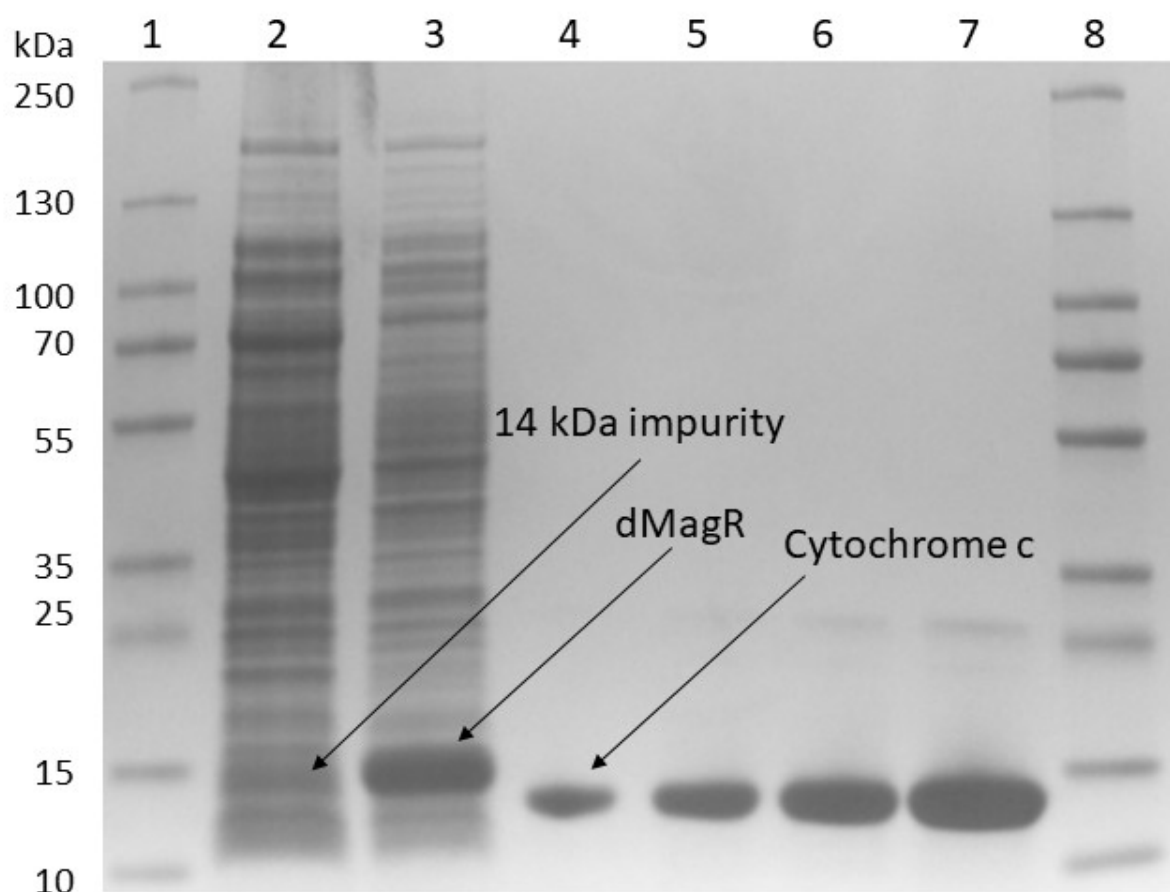

**Supplementary Figure S3.** SDS-PAGE analysis for quantification of dMagR. lane 1: standard protein ladder; lane 2: supernatant of 12 g L<sup>-1</sup> BL21-Blank cell disruption lane 3: supernatant of 12 g L<sup>-1</sup> BL21-dMagR cell disruption; lane 4: 1.05 µg cytochrome c; lane 5: 2.62 µg cytochrome c; lane 6: 5.25 µg cytochrome c; lane 7: 10.50 µg cytochrome c; lane 8: standard protein ladder. The volume of the band around 14 kDa in lane 2 was subtracted from the volume of the dMagR band in lane 3 for proper quantification.
